# Supplementary material for: MtSNPscore: a combined evidence approach for assessing cumulative impact of mitochondrial variations in disease
Source: PubMed Central journal article supplement (PMC2745589; doi:10.1186/1471-2105-10-s8-s7), 2009-08-27
Supplement: 1471-2105-10-S8-S7-S2.pdf [file 1471-2105-10-S8-S7-S2.pdf]

Distribution of reported pathogenic mutations extracted from literature across mtDNA

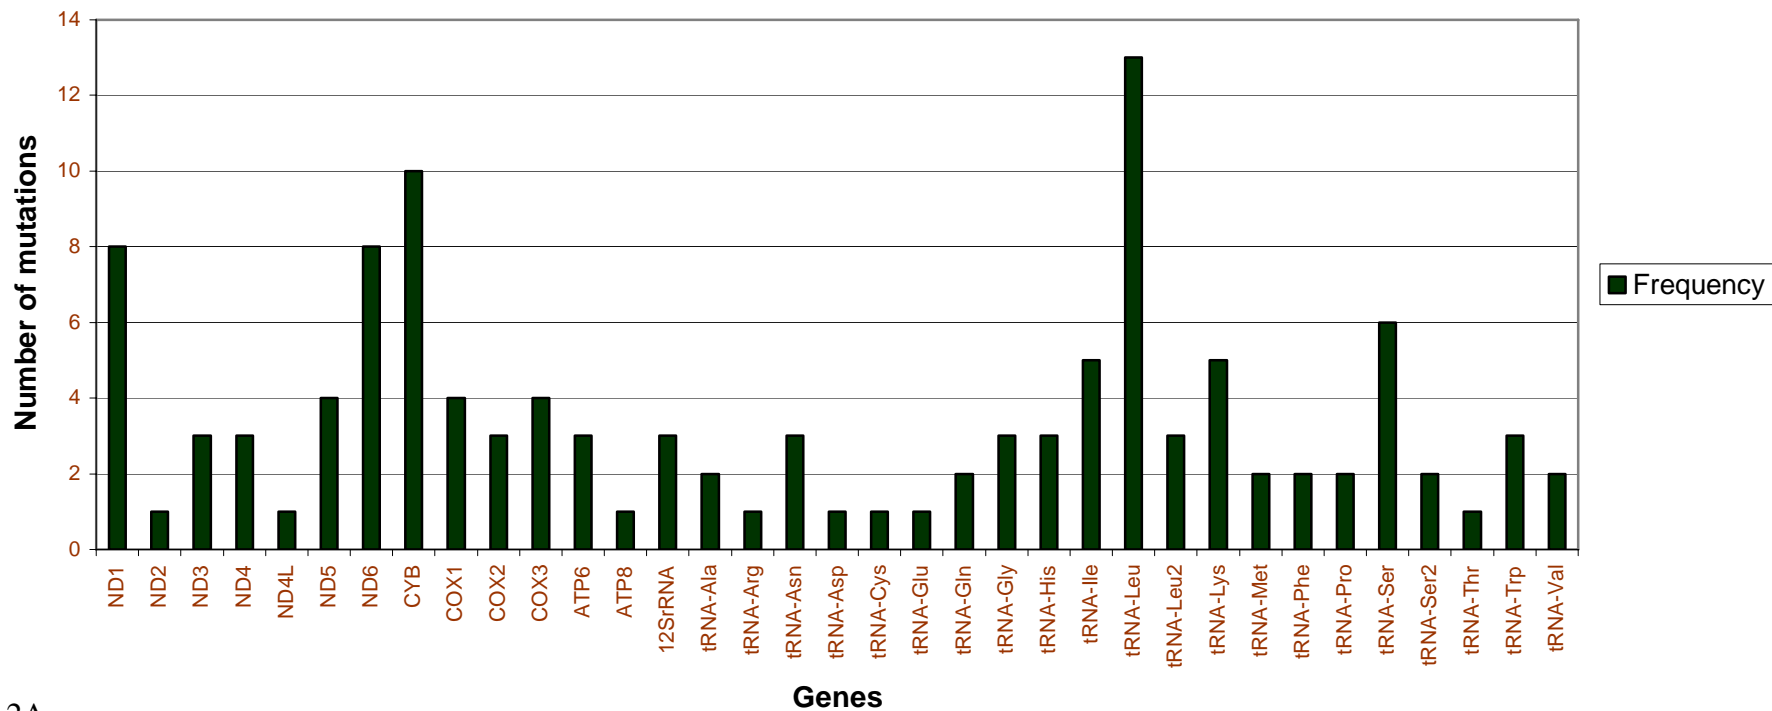

2A

Score distribution for reported mutations

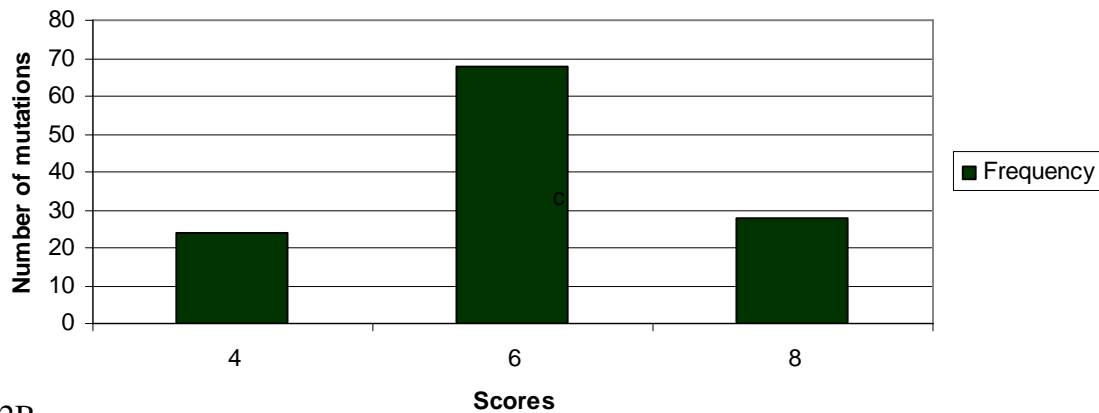

2B
