# Supplementary material for: MtSNPscore: a combined evidence approach for assessing cumulative impact of mitochondrial variations in disease
Source: PubMed Central journal article supplement (PMC2745589; doi:10.1186/1471-2105-10-s8-s7), 2009-08-27

## Summary of *in silico* prediction tools

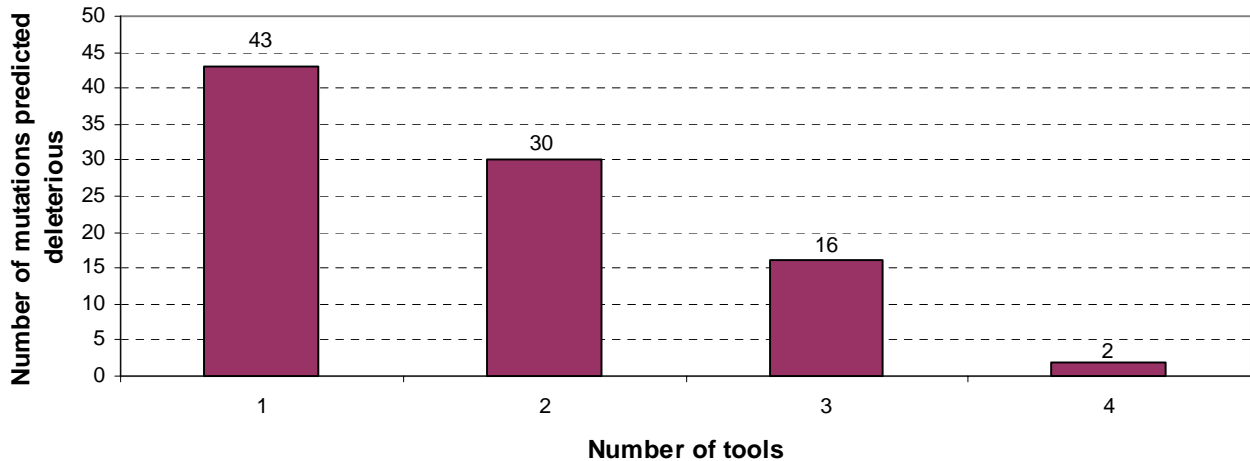

Supplement: 1471-2105-10-S8-S7-S4.pdf [file 1471-2105-10-S8-S7-S4.pdf]
